# Supplementary material for: Mutation of YL Results in a Yellow Leaf with Chloroplast RNA Editing Defect in Soybean
Source: PubMed Central journal article supplement (PMC7348699; doi:10.3390/ijms21124275), 2020-06-16
Supplement: ijms-21-04275-s001.pdf [file ijms-21-04275-s001.pdf]

**Table S1.** Comparison of the extent of RNA editing of chloroplast sites between the wild type and *yl* mutant by RNA-seq.

| Gene         | Position <sup>a</sup> | Wild type        |             | <i>yl</i>        |             |
|--------------|-----------------------|------------------|-------------|------------------|-------------|
|              |                       | Coverage [reads] | Editing (%) | Coverage [reads] | Editing (%) |
| <i>accD</i>  | 617                   | 696              | 91.24       | 258              | 84.50       |
| <i>atpF</i>  | 92                    | 3531             | 97.73       | 2260             | 96.59       |
| <i>clpP</i>  | 559                   | 2338             | 94.65       | 1990             | 55.73       |
| <i>ndhA</i>  | 341                   | 689              | 91.29       | 450              | 94.00       |
| <i>ndhB</i>  | 1073                  | 2277             | 90.65       | 1553             | 90.79       |
|              | 9                     | 28               | 100.00      | 20               | 100.00      |
|              | 149                   | 50               | 96.00       | 28               | 96.43       |
|              | 542                   | 290              | 100.00      | 192              | 100.00      |
|              | 586                   | 95               | 91.58       | 74               | 20.27       |
|              | 737                   | 126              | 98.41       | 147              | 6.12        |
|              | 746                   | 175              | 99.43       | 153              | 43.79       |
|              | 830                   | 266              | 99.62       | 134              | 46.27       |
|              | 836                   | 267              | 100.00      | 78               | 100.00      |
|              | 1112                  | 189              | 96.83       | 71               | 100.00      |
|              | 1255                  | 727              | 99.72       | 209              | 98.56       |
|              | 1481                  | 138              | 100.00      | 50               | 100.00      |
|              | <i>ndhC</i>           | 323              | 1231        | 95.69            | 636         |
| <i>ndhD</i>  | 2                     | 1686             | 55.28       | 1488             | 55.85       |
|              | 383                   | 1896             | 91.59       | 1532             | 92.95       |
|              | 674                   | 2597             | 89.37       | 1836             | 4.52        |
|              | 878                   | 3442             | 84.02       | 2354             | 31.61       |
|              | 1298                  | 2026             | 87.76       | 1376             | 94.40       |
| <i>ndhE</i>  | 233                   | 2342             | 89.75       | 1136             | 84.86       |
| <i>ndhF</i>  | 290                   | 645              | 58.29       | 192              | 73.44       |
| <i>petB</i>  | 611                   | 1260             | 99.05       | 3557             | 18.11       |
| <i>psaI</i>  | 79                    | 2311             | 94.50       | 884              | 87.78       |
| <i>psbE</i>  | 214                   | 1658             | 99.70       | 1132             | 99.65       |
| <i>psbF</i>  | 6                     | 1654             | 85.31       | 1289             | 92.47       |
|              | 77                    | 2694             | 94.51       | 1523             | 93.11       |
| <i>psbL</i>  | 2                     | 1239             | 89.99       | 700              | 46.14       |
| <i>rpoA</i>  | 200                   | 1430             | 73.01       | 1091             | 72.23       |
| <i>rpoB</i>  | 338                   | 132              | 68.18       | 187              | 66.84       |
|              | 551                   | 173              | 39.88       | 120              | 0.00        |
|              | 566                   | 160              | 37.50       | 121              | 57.02       |
|              | 2000                  | 145              | 86.90       | 161              | 37.27       |
|              | 41                    | 556              | 96.22       | 497              | 97.99       |
| <i>rpoC1</i> | 488                   | 1054             | 47.25       | 1152             | 51.48       |
|              | 134                   | 1566             | 96.87       | 817              | 35.50       |
| <i>rps2</i>  | 248                   | 1875             | 98.56       | 967              | 57.81       |
| <i>rps12</i> | 554 <sup>b</sup>      | 139              | 94.96       | 48               | 81.25       |
| <i>rps14</i> | 80                    | 1159             | 86.11       | 2641             | 89.10       |
| <i>rps16</i> | 499 <sup>b</sup>      | 350              | 73.14       | 260              | 11.92       |
|              | 212                   | 2662             | 95.79       | 643              | 91.91       |
| <i>rps18</i> | 221                   | 1349             | 84.36       | 516              | 73.84       |

The coverage of each editing site is presented in reads. Editing (%) =  $U/(C + U) \times 100$ .

<sup>a</sup> Position is given with respect to the initiation codon of each chloroplast transcript.

<sup>b</sup> The RNA editing site is in the intron of the plastid gene. The position here is given with respect to the initiation codon of the DNA sequence of each gene.

**Table S2.** Verification of the extent of chloroplast RNA editing by Sanger sequencing.

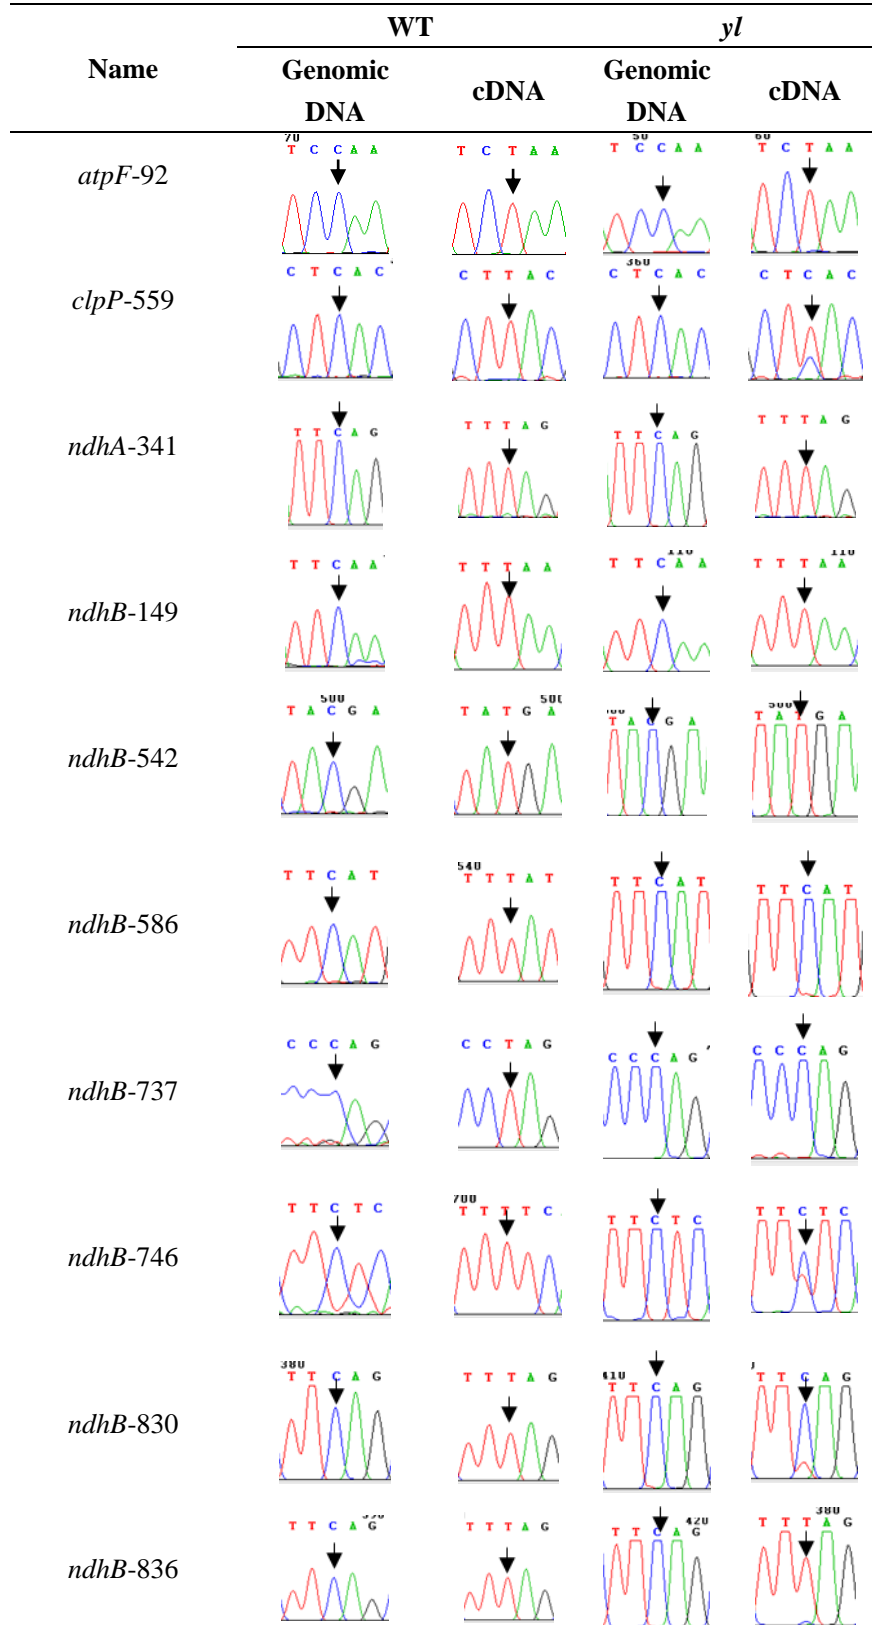

Table S2. (continued).

| Name              | WT                                                                                  |                                                                                     | <i>yl</i>                                                                            |                                                                                       |
|-------------------|-------------------------------------------------------------------------------------|-------------------------------------------------------------------------------------|--------------------------------------------------------------------------------------|---------------------------------------------------------------------------------------|
|                   | Genomic DNA                                                                         | cDNA                                                                                | Genomic DNA                                                                          | cDNA                                                                                  |
| <i>ndhB</i> -1112 | 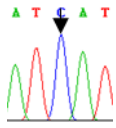   |    |    |    |
| <i>ndhB</i> -1255 |    |    |    |    |
| <i>ndhB</i> -1481 |    |    |    |    |
| <i>ndhC</i> -323  |    |    |    |    |
| <i>ndhD</i> -383  |   |   |   |   |
| <i>ndhD</i> -674  |  |  |  |  |
| <i>ndhD</i> -878  |  |  |  |  |
| <i>ndhD</i> -1298 |  |  |  |  |
| <i>petB</i> -611  |  |  |  |  |
| <i>psaI</i> -79   |  |  |  |  |
| <i>psbE</i> -214  |  |  |  |  |

Table S2. (continued).

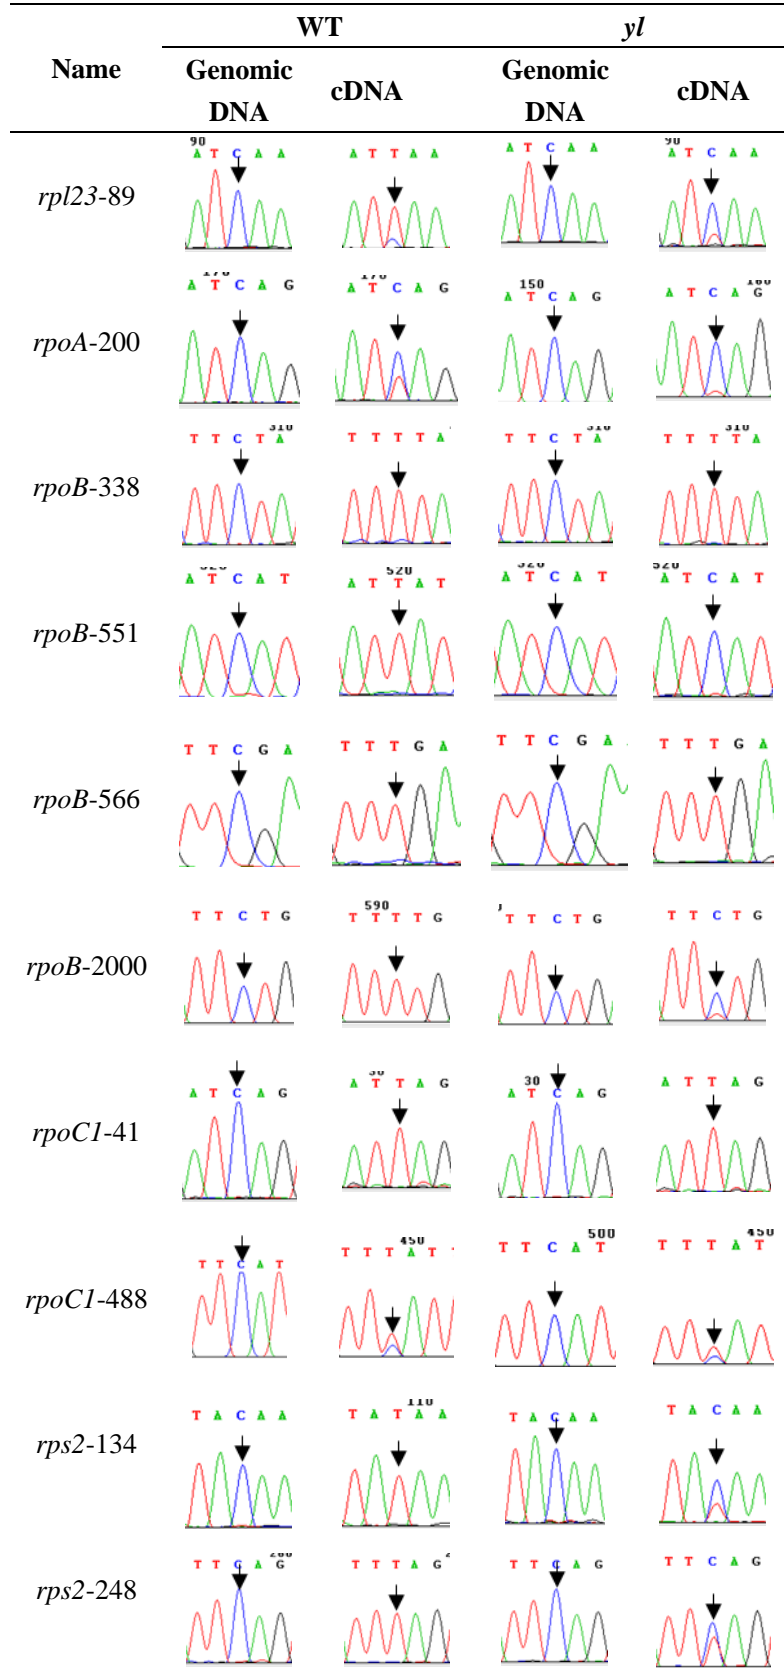

**Table S2.** (continued).

| Name             | WT          |      | <i>yl</i>   |      |
|------------------|-------------|------|-------------|------|
|                  | Genomic DNA | cDNA | Genomic DNA | cDNA |
| <i>rps14-80</i>  |             |      |             |      |
| <i>rps16-212</i> |             |      |             |      |
| <i>rps18-221</i> |             |      |             |      |

The sequence results were derived from PCR or RT-PCR products amplified from DNA or cDNA, separately. The editing sites are indicated by arrows.

**Table S3.** Primers used in this study.

| <b>Primers used for fine mapping of <i>YL</i></b>      |                                  |                                  |
|--------------------------------------------------------|----------------------------------|----------------------------------|
| <b>Name</b>                                            | <b>Forward primers (5'-3')</b>   | <b>Reverse primers (5'-3')</b>   |
| at009                                                  | AATCCATTCACTCTCCCAA              | TCATCGCCAACATTTCACTA             |
| att002                                                 | TTGCCCAAGGACTTCCACAT             | GAACAAGCCCTTCGGAGATT             |
| at015                                                  | AATAATGCACACGACTTAGG<br>GT       | TAATCAGCATCAGCACATACAA           |
| at022                                                  | CGGAGCAAGTTGGTTTTGAC<br>TG       | ATTATTTGGGGAATTGGGGTGT           |
| S3                                                     | GTGATGCTGTTTCTTGCAG<br>TT        | ATGAGTTATCCTGCTGCCTTGA           |
| S7-3                                                   | AATACGATGGCGATAAGAA<br>C         | ACAGGAACAGGAGGAAGTGA             |
| <b>Primers used for determining the <i>YL</i> gene</b> |                                  |                                  |
| <b>Name</b>                                            | <b>Forward primers (5'-3')</b>   | <b>Reverse primers (5'-3')</b>   |
| Seq28k-1                                               | CGCAACTTGTTTCATCACTG<br>TA       | TGAAGGGAATAGGGAGAATCT<br>C       |
| Seq28k-2                                               | GAGATTCTCCCTATTCCCTT             | TACTCACATTTGCACCTTCG             |
| Seq28k-3                                               | AATACGATGGCGATAAGAA<br>C         | ACAGGAACAGGAGGAAGTGA             |
| Seq28k-4                                               | AAATACGTAATCGCATTTCGA<br>GT      | GCAAAGCAGGAAATCAGATAC<br>A       |
| Seq28k-5                                               | CATGGCTACTTTCACCTTTA             | TTCACCTTCTCTCCTTCTA              |
| Seq28k-6                                               | ACTTTGTAGTTCTGTGCCTCT<br>TG      | AACATGCTGAGCTGGAATCTTA<br>A      |
| Seq28k-7                                               | ATGACTTTAAGATTCCAGCT<br>CAG      | GGACATTTCCCTTCACTACCAC<br>C      |
| Seq28k-8                                               | CTCATAGATAAACTGGATA<br>GGGAAG    | TTTTAGGCACAAGGGCAAATAG<br>AAC    |
| Seq28k-9                                               | CATGGCTACTTTCACCTTTA             | ATTAAGATGCCATGCTGACA             |
| Seq28k-10                                              | CTTATCAAGTCACATGGACA<br>TTGTG    | CTACAAGGCTAACCAGCAAGCT<br>CTT    |
| Seq28k-11                                              | AGGTCATGGGAAAGTGAGG<br>ACAGTG    | TGATTCCTGTGGTATCTTGGTG<br>GGT    |
| Seq28k-12                                              | TGTTGAATACACCACAGAGG<br>AGGCT    | CAATAGGAACAACCTCGAAGGG<br>ACTG   |
| Seq28k-13                                              | AATATTGTAGCCTCTATAGG<br>AATCTGGC | GTCTTTTGTGTTAGATCAACC<br>CAAATA  |
| Seq28k-14                                              | TGAGATGGTCCCTGATGGAA<br>AATAT    | TCTGAAAGCTGACCCAGTAGTG<br>GAA    |
| Seq28k-15                                              | ATTACTGGTCCTTTCTGCTTC<br>AC      | TAATAGCGTAAGTCTGCACAAC<br>AAG    |
| Seq28k-16                                              | GCCTCTTTTGTATCATCTAT<br>GTCCTTG  | TAGTTCAGACCCTACTTACTTT<br>ACTCTG |

|           |                                  |                                  |
|-----------|----------------------------------|----------------------------------|
| Seq28k-17 | TCCCACTATTTAATGTGATA<br>TTTGC    | AAACAACAAGACAAGAAGACT<br>ACCC    |
| Seq28k-18 | TGCCTACTCGTGGAAATGTTG            | TGAAGGTTTCGGGTTTGT               |
| Seq28k-19 | TTTTCTTATAGCGACTTGCC             | CATCAGGGACCATCTCATTC             |
| Seq28k-20 | ATGTCATACTCCGACTTGTT             | CATAGTTTCTGATATTTCCA             |
| Seq28k-21 | ACATTTTCGCTCTATTCTGTTC           | GACGGTFACTTGACTTCTTTCT           |
| Seq28k-22 | TTCATATTTGCGTTAATGAT<br>TTCTC    | TCATTTCAAAGTGTTTCATTGGA<br>TAC   |
| Seq28k-23 | ACTGCAATGAGTAATGCTGA<br>GCCACC   | GTCGTCGTCAAACCAAACCAAA<br>TCCTAT |
| Seq28k-24 | GGCGGCATAGCATCGTCATC<br>AT       | TGGCGAAGGAGACTCTAGGAA<br>CT      |
| Seq28k-25 | GCTAAATGAGAAGCTAAAC<br>TTACCCTAA | CAAGACAAGAAGACTACCCTA<br>AACTA   |
| Seq28k-26 | TCAAGTCTCAAGATACGCTT<br>ATTATCAT | CGTCAAACTTTAATTTTATTCT<br>TTCTG  |
| Seq28k-27 | AAAAGTATAGGGAAAGGGT<br>GGGAGA    | TTGGCATTGCTAAGTGAGACA<br>GAC     |
| Seq28k-28 | TTGAATGCTGTTGTCGTAAT<br>TTTCT    | CCATAGGCAAAGCTTATACCGT<br>ATT    |
| Seq28k-29 | AACCTCCACGATACTTCCAG<br>AACCT    | TCAATCATCCAGAACAGGGGAAT<br>CAG   |
| Seq28k-30 | AAATTGGTAGGAAGGTTACT<br>TATGT    | CAATGATTATCTTTTCTAGGAT<br>TTG    |
| Seq28k-31 | GTGGATCTTGGAGATAGAA<br>ATA       | TTTCATTACTIONGTACCGATTAC         |
| Seq28k-32 | GGGTCAAGGATGTGACAAC<br>GAT       | CTGATGCCACTCAACCATGACA           |
| Seq28k-33 | ATTCACCAGGGCTTAACAAA<br>GT       | AAAAGAACGAAGGGAGTATCA<br>T       |
| Seq28k-34 | CACCGCCTCTAATACTACGC<br>TA       | GGCGAAGGAGACTCTAGGAAC<br>T       |

---

Primers used for vector construction

---

| Name          | Forward primers (5'-3')                 | Reverse primers (5'-3')              |
|---------------|-----------------------------------------|--------------------------------------|
| <i>YL-GFP</i> | TGCCATGGCAATGGAAGTTC<br>TCTCTGTGTCTGTCT | GGACTAGTTCAGCATGATTCC<br>TGTGGTATCTT |

---

Primers used for real-time PCR

---

| Name                | Forward primers (5'-3')     | Reverse primers (5'-3')     |
|---------------------|-----------------------------|-----------------------------|
| <i>Actin</i>        | ATCCGGAATCAAACGCACCC<br>T   | AGAGCGTCAGCGAAGAAGGAA<br>G  |
| <i>ATP synthase</i> | CGATTTCCGCATCCGCATCG<br>AG  | GAGCCCTTCCCGGTGAACTCAT      |
| <i>YL</i>           | TACCCCTCCTTCAATCCTTCC<br>AC | TGAGCATCTTTCTCACTGCCAA<br>G |

---

| Primers used for verifying RNA editing sites by Sanger sequencing |                                   |                                   |
|-------------------------------------------------------------------|-----------------------------------|-----------------------------------|
| Name                                                              | Forward primers (5'-3')           | Reverse primers (5'-3')           |
| <i>accD</i>                                                       | ATGGA AAAATGGTGGTTTAA<br>TTCTAT   | CTATGCCTTATCATT TTTTAGTCA<br>AAG  |
| <i>atpF</i>                                                       | ATGAAAAATATAACCGATTC<br>TTTCC     | CTAATCAGTTAT TTTTCTTTCA<br>TCGTC  |
| <i>clpP</i>                                                       | TTATTCAACGGCTACAAGAT<br>CTACA     | ATGCCCAT TGGTGTCCAAGAG<br>TAC     |
| <i>ndhA</i>                                                       | ATGATAATTTATTTAACAGA<br>GATAC     | TTACAGTGAAAACAGTTGAGAC<br>GAA     |
| <i>ndhB</i>                                                       | ATGATCTGGCATGTACAGAA<br>TGAAA     | CTAAAAAAGGGTATCCTGAGC<br>AATT     |
| <i>ndhC</i>                                                       | ATGTTTCTTCTTTACGAATAT<br>GATA     | TTAAGACCATTCTAATGCCCCC<br>TTT     |
| <i>ndhD</i>                                                       | ACGAATTATTTTCCTTGGTT<br>AACAAACAG | CTATAAAAAATTAGATAGAATA<br>GCTTCA  |
| <i>petB</i>                                                       | ATGAGTGTGCGGCTTGTTTT<br>AATGGATC  | CTATAAAGGACCAGAAATGCCT<br>TGCTTA  |
| <i>psaI</i>                                                       | ATGATAAACTTTCCCTCCAT<br>TT        | CTAAAAAATCTTGTTTTTTTGA<br>AC      |
| <i>psbE</i>                                                       | CTAAAAAGATCTACTAAATT<br>CATCAAGT  | ATGTCTGGAAGCACAGGAGAA<br>CGTT     |
| <i>rpl23</i>                                                      | ATGAATGGAATAAAATATG<br>CAGTAT     | TTAAGTTTTTTTCTTTCTAAGAG<br>GT     |
| <i>rpoA</i>                                                       | TTATGCAAAATGCTTTTCTA<br>TTT       | ATGGTTCGAGAGAAAATAAGA<br>GT       |
| <i>rpoB</i>                                                       | ATGCTTGGGGATGGAAATG<br>AAG        | TTAAGCTTCCTTCCTATGAATC<br>CGG     |
| <i>rpoC1</i>                                                      | ATGATTGATCAGTATAAACA<br>TCAACAAC  | TTAGATATCATATGAATAGGCC<br>CGG     |
| <i>rps2</i>                                                       | ATGACAAAAAGATATTGGA<br>ACATAA     | TCAAGAATTTTCGTATATAGCTA<br>GAA    |
| <i>rps14</i>                                                      | ATGGCAAGGAAAAGTGTGA<br>TTCAGA     | TTACCAACTGGATCTTGTTGCA<br>CCG     |
| <i>rps16</i>                                                      | ATGGTAAAACCTTCGTTTGAA<br>ACGAT    | TTAATGGAATTTTCGTTTGTTGA<br>TTC    |
| <i>rps18</i>                                                      | ATGGA AAAATCTAAGCGAC<br>TCTTTATGA | TTAATTTCTATAT TTTT TTTTC<br>TTAAA |
